# Supplementary material for: Dependence of the Firearm-Related Homicide Rate on Gun Availability: A Mathematical Analysis
Source: PLoS One. 2013 Jul 26;8(7):e71606. doi: 10.1371/journal.pone.0071606 (PMC3724776; doi:10.1371/journal.pone.0071606)
Supplement: File S1 — A mathematica file which allows to visualize the results of modeling in the context of the one-against-many model. (NB) [file pone.0071606.s002.nb]

(* Content-type: application/vnd.wolfram.mathematica *)

(*** Wolfram Notebook File ***)
(* http://www.wolfram.com/nb *)

(* CreatedBy='Mathematica 9.0' *)

(*CacheID: 234*)
(* Internal cache information:
NotebookFileLineBreakTest
NotebookFileLineBreakTest
NotebookDataPosition[       157,          7]
NotebookDataLength[     46113,       1207]
NotebookOptionsPosition[     45083,       1170]
NotebookOutlinePosition[     45421,       1185]
CellTagsIndexPosition[     45378,       1182]
WindowFrame->Normal*)

(* Beginning of Notebook Content *)
Notebook[{

Cell[CellGroupData[{
Cell[BoxData[
 RowBox[{
  RowBox[{"(*", " ", 
   RowBox[{
   "Start", " ", "with", " ", "i", " ", "armed", " ", "and", " ", "j", " ", 
    "unarmed", " ", "people"}], " ", "*)"}], " ", 
  RowBox[{
   RowBox[{"d", "=."}], ";", " ", 
   RowBox[{"p", "=."}], ";", " ", 
   RowBox[{"nn", "=", "10"}], ";", " ", 
   RowBox[{"Do", "[", 
    RowBox[{
     RowBox[{"Do", "[", 
      RowBox[{
       RowBox[{"Do", "[", 
        RowBox[{
         RowBox[{"Do", "[", 
          RowBox[{
           RowBox[{
            RowBox[{"f", "[", 
             RowBox[{"i", ",", "j", ",", "l", ",", "m"}], "]"}], "=."}], ",", 
           
           RowBox[{"{", 
            RowBox[{"i", ",", "0", ",", "nn"}], "}"}]}], "]"}], ",", 
         RowBox[{"{", 
          RowBox[{"j", ",", "0", ",", "nn"}], "}"}]}], "]"}], ",", 
       RowBox[{"{", 
        RowBox[{"l", ",", "0", ",", "nn"}], "}"}]}], "]"}], ",", 
     RowBox[{"{", 
      RowBox[{"m", ",", "0", ",", "nn"}], "}"}]}], "]"}], ";", 
   RowBox[{"Do", "[", 
    RowBox[{
     RowBox[{"Do", "[", 
      RowBox[{
       RowBox[{
        RowBox[{"f", "[", 
         RowBox[{"i", ",", "j", ",", "i", ",", "j"}], "]"}], "=", 
        RowBox[{
         RowBox[{"(", 
          RowBox[{"1", "-", "d"}], ")"}], "*", 
         RowBox[{
          RowBox[{"(", 
           RowBox[{"1", "-", 
            RowBox[{
             RowBox[{"(", 
              RowBox[{"1", "-", "p"}], ")"}], "^", "i"}]}], ")"}], "/", 
          RowBox[{"(", 
           RowBox[{"1", "-", 
            RowBox[{
             RowBox[{"(", 
              RowBox[{"1", "-", "d"}], ")"}], "*", 
             RowBox[{
              RowBox[{"(", 
               RowBox[{"1", "-", "p"}], ")"}], "^", "i"}]}]}], ")"}]}]}]}], 
       ",", 
       RowBox[{"{", 
        RowBox[{"i", ",", "1", ",", "nn"}], "}"}]}], "]"}], ",", 
     RowBox[{"{", 
      RowBox[{"j", ",", "0", ",", "nn"}], "}"}]}], "]"}]}]}]], "Input",
 CellChangeTimes->{3.5769515026717577`*^9}],

Cell[BoxData[
 RowBox[{
  StyleBox[
   RowBox[{"Unset", "::", "norep"}], "MessageName"], 
  RowBox[{
  ":", " "}], "\<\"Assignment on \[NoBreak]\\!\\(f\\)\[NoBreak] for \
\[NoBreak]\\!\\(f[\\(\\(0, 0, 0, 0\\)\\)]\\)\[NoBreak] not found. \
\\!\\(\\*ButtonBox[\\\"\[RightSkeleton]\\\", ButtonStyle->\\\"Link\\\", \
ButtonFrame->None, ButtonData:>\\\"paclet:ref/message/Unset/norep\\\", \
ButtonNote -> \\\"Unset::norep\\\"]\\)\"\>"}]], "Message", "MSG",
 CellChangeTimes->{
  3.576951497627816*^9, 3.576951677280519*^9, 3.576952174841434*^9, {
   3.576952376039863*^9, 3.5769523875985613`*^9}}],

Cell[BoxData[
 RowBox[{
  StyleBox[
   RowBox[{"Unset", "::", "norep"}], "MessageName"], 
  RowBox[{
  ":", " "}], "\<\"Assignment on \[NoBreak]\\!\\(f\\)\[NoBreak] for \
\[NoBreak]\\!\\(f[\\(\\(1, 0, 0, 0\\)\\)]\\)\[NoBreak] not found. \
\\!\\(\\*ButtonBox[\\\"\[RightSkeleton]\\\", ButtonStyle->\\\"Link\\\", \
ButtonFrame->None, ButtonData:>\\\"paclet:ref/message/Unset/norep\\\", \
ButtonNote -> \\\"Unset::norep\\\"]\\)\"\>"}]], "Message", "MSG",
 CellChangeTimes->{
  3.576951497627816*^9, 3.576951677280519*^9, 3.576952174841434*^9, {
   3.576952376039863*^9, 3.576952387716291*^9}}],

Cell[BoxData[
 RowBox[{
  StyleBox[
   RowBox[{"Unset", "::", "norep"}], "MessageName"], 
  RowBox[{
  ":", " "}], "\<\"Assignment on \[NoBreak]\\!\\(f\\)\[NoBreak] for \
\[NoBreak]\\!\\(f[\\(\\(2, 0, 0, 0\\)\\)]\\)\[NoBreak] not found. \
\\!\\(\\*ButtonBox[\\\"\[RightSkeleton]\\\", ButtonStyle->\\\"Link\\\", \
ButtonFrame->None, ButtonData:>\\\"paclet:ref/message/Unset/norep\\\", \
ButtonNote -> \\\"Unset::norep\\\"]\\)\"\>"}]], "Message", "MSG",
 CellChangeTimes->{
  3.576951497627816*^9, 3.576951677280519*^9, 3.576952174841434*^9, {
   3.576952376039863*^9, 3.576952387717277*^9}}],

Cell[BoxData[
 RowBox[{
  StyleBox[
   RowBox[{"General", "::", "stop"}], "MessageName"], 
  RowBox[{
  ":", " "}], "\<\"Further output of \[NoBreak]\\!\\(\\*StyleBox[\\(Unset :: \
norep\\), \\\"MessageName\\\"]\\)\[NoBreak] will be suppressed during this \
calculation. \\!\\(\\*ButtonBox[\\\"\[RightSkeleton]\\\", \
ButtonStyle->\\\"Link\\\", ButtonFrame->None, \
ButtonData:>\\\"paclet:ref/message/General/stop\\\", ButtonNote -> \
\\\"General::stop\\\"]\\)\"\>"}]], "Message", "MSG",
 CellChangeTimes->{
  3.576951497627816*^9, 3.576951677280519*^9, 3.576952174841434*^9, {
   3.576952376039863*^9, 3.576952387718299*^9}}]
}, Open  ]],

Cell[BoxData[
 RowBox[{
  RowBox[{"(*", " ", 
   RowBox[{
   "Calculate", " ", "all", " ", "the", " ", "absorption", " ", 
    "probabilities"}], " ", "*)"}], " ", 
  RowBox[{
   RowBox[{"Do", "[", 
    RowBox[{
     RowBox[{"Do", "[", 
      RowBox[{
       RowBox[{"Do", "[", 
        RowBox[{
         RowBox[{
          RowBox[{"f", "[", 
           RowBox[{"i", ",", "j", ",", "0", ",", "m"}], "]"}], "=", "0"}], 
         ",", 
         RowBox[{"{", 
          RowBox[{"m", ",", "0", ",", "nn"}], "}"}]}], "]"}], ",", 
       RowBox[{"{", 
        RowBox[{"j", ",", "0", ",", "nn"}], "}"}]}], "]"}], ",", 
     RowBox[{"{", 
      RowBox[{"i", ",", "0", ",", "nn"}], "}"}]}], "]"}], ";", 
   RowBox[{"Do", "[", 
    RowBox[{
     RowBox[{"Do", "[", 
      RowBox[{
       RowBox[{
        RowBox[{"f", "[", 
         RowBox[{
          RowBox[{"i", "+", "1"}], ",", "j", ",", "i", ",", "j"}], "]"}], "=", 
        RowBox[{
         RowBox[{"(", 
          RowBox[{
           RowBox[{"d", "*", 
            RowBox[{
             RowBox[{"(", 
              RowBox[{"i", "+", "1"}], ")"}], "/", 
             RowBox[{"(", 
              RowBox[{"i", "+", "j", "+", "1"}], ")"}]}], 
            RowBox[{"(", 
             RowBox[{"1", "-", 
              RowBox[{
               RowBox[{"(", 
                RowBox[{"1", "-", "p"}], ")"}], "^", "i"}]}], ")"}]}], "+", 
           RowBox[{"d", "*", 
            RowBox[{
             RowBox[{"(", 
              RowBox[{"i", "+", "1"}], ")"}], "/", 
             RowBox[{"(", 
              RowBox[{"i", "+", "1", "+", "j"}], ")"}]}], "*", 
            RowBox[{
             RowBox[{"(", 
              RowBox[{"1", "-", "p"}], ")"}], "^", "i"}], "*", 
            RowBox[{"f", "[", 
             RowBox[{"i", ",", "j", ",", "i", ",", "j"}], "]"}]}]}], ")"}], 
         "/", 
         RowBox[{"(", 
          RowBox[{"1", "-", 
           RowBox[{
            RowBox[{"(", 
             RowBox[{"1", "-", "d"}], ")"}], "*", 
            RowBox[{
             RowBox[{"(", 
              RowBox[{"1", "-", "p"}], ")"}], "^", 
             RowBox[{"(", 
              RowBox[{"i", "+", "1"}], ")"}]}]}]}], ")"}]}]}], ",", 
       RowBox[{"{", 
        RowBox[{"j", ",", "0", ",", "nn"}], "}"}]}], "]"}], ",", 
     RowBox[{"{", 
      RowBox[{"i", ",", "1", ",", 
       RowBox[{"nn", "-", "1"}]}], "}"}]}], "]"}], ";", 
   RowBox[{"Do", "[", 
    RowBox[{
     RowBox[{"Do", "[", 
      RowBox[{
       RowBox[{
        RowBox[{"f", "[", 
         RowBox[{"i", ",", 
          RowBox[{"j", "+", "1"}], ",", "i", ",", "j"}], "]"}], "=", 
        RowBox[{
         RowBox[{"(", 
          RowBox[{
           RowBox[{"d", "*", 
            RowBox[{
             RowBox[{"(", 
              RowBox[{"j", "+", "1"}], ")"}], "/", 
             RowBox[{"(", 
              RowBox[{"i", "+", "j", "+", "1"}], ")"}]}], 
            RowBox[{"(", 
             RowBox[{"1", "-", 
              RowBox[{
               RowBox[{"(", 
                RowBox[{"1", "-", "p"}], ")"}], "^", "i"}]}], ")"}]}], "+", 
           RowBox[{"d", "*", 
            RowBox[{
             RowBox[{"(", 
              RowBox[{"j", "+", "1"}], ")"}], "/", 
             RowBox[{"(", 
              RowBox[{"i", "+", "1", "+", "j"}], ")"}]}], "*", 
            RowBox[{
             RowBox[{"(", 
              RowBox[{"1", "-", "p"}], ")"}], "^", "i"}], "*", 
            RowBox[{"f", "[", 
             RowBox[{"i", ",", "j", ",", "i", ",", "j"}], "]"}]}]}], ")"}], 
         "/", 
         RowBox[{"(", 
          RowBox[{"1", "-", 
           RowBox[{
            RowBox[{"(", 
             RowBox[{"1", "-", "d"}], ")"}], "*", 
            RowBox[{
             RowBox[{"(", 
              RowBox[{"1", "-", "p"}], ")"}], "^", "i"}]}]}], ")"}]}]}], ",", 
       
       RowBox[{"{", 
        RowBox[{"j", ",", "0", ",", "nn"}], "}"}]}], "]"}], ",", 
     RowBox[{"{", 
      RowBox[{"i", ",", "1", ",", 
       RowBox[{"nn", "-", "1"}]}], "}"}]}], "]"}], ";", 
   RowBox[{"Do", "[", 
    RowBox[{
     RowBox[{"Do", "[", 
      RowBox[{
       RowBox[{"Do", "[", 
        RowBox[{
         RowBox[{
          RowBox[{"f", "[", 
           RowBox[{"i", ",", "j", ",", "l", ",", "j"}], "]"}], "=", 
          RowBox[{
           RowBox[{"(", 
            RowBox[{"d", "*", 
             RowBox[{"i", "/", 
              RowBox[{"(", 
               RowBox[{"i", "+", "j"}], ")"}]}], "*", 
             RowBox[{
              RowBox[{"(", 
               RowBox[{"1", "-", "p"}], ")"}], "^", 
              RowBox[{"(", 
               RowBox[{"i", "-", "1"}], ")"}]}], "*", 
             RowBox[{"f", "[", 
              RowBox[{
               RowBox[{"i", "-", "1"}], ",", "j", ",", "l", ",", "j"}], 
              "]"}]}], ")"}], "/", 
           RowBox[{"(", 
            RowBox[{"1", "-", 
             RowBox[{
              RowBox[{"(", 
               RowBox[{"1", "-", "d"}], ")"}], "*", 
              RowBox[{
               RowBox[{"(", 
                RowBox[{"1", "-", "p"}], ")"}], "^", "i"}]}]}], ")"}]}]}], 
         ",", 
         RowBox[{"{", 
          RowBox[{"i", ",", 
           RowBox[{"l", "+", "2"}], ",", "nn"}], "}"}]}], "]"}], ",", 
       RowBox[{"{", 
        RowBox[{"j", ",", "0", ",", "nn"}], "}"}]}], "]"}], ",", 
     RowBox[{"{", 
      RowBox[{"l", ",", "1", ",", "nn"}], "}"}]}], "]"}], ";", 
   RowBox[{"Do", "[", 
    RowBox[{
     RowBox[{"Do", "[", 
      RowBox[{
       RowBox[{"Do", "[", 
        RowBox[{
         RowBox[{
          RowBox[{"f", "[", 
           RowBox[{"i", ",", "j", ",", "i", ",", "m"}], "]"}], "=", 
          RowBox[{
           RowBox[{"(", 
            RowBox[{"d", "*", 
             RowBox[{"j", "/", 
              RowBox[{"(", 
               RowBox[{"i", "+", "j"}], ")"}]}], "*", 
             RowBox[{
              RowBox[{"(", 
               RowBox[{"1", "-", "p"}], ")"}], "^", "i"}], "*", 
             RowBox[{"f", "[", 
              RowBox[{"i", ",", 
               RowBox[{"j", "-", "1"}], ",", "i", ",", "m"}], "]"}]}], ")"}], 
           "/", 
           RowBox[{"(", 
            RowBox[{"1", "-", 
             RowBox[{
              RowBox[{"(", 
               RowBox[{"1", "-", "d"}], ")"}], "*", 
              RowBox[{
               RowBox[{"(", 
                RowBox[{"1", "-", "p"}], ")"}], "^", "i"}]}]}], ")"}]}]}], 
         ",", 
         RowBox[{"{", 
          RowBox[{"i", ",", "1", ",", "nn"}], "}"}]}], "]"}], ",", 
       RowBox[{"{", 
        RowBox[{"j", ",", 
         RowBox[{"m", "+", "2"}], ",", "nn"}], "}"}]}], "]"}], ",", 
     RowBox[{"{", 
      RowBox[{"m", ",", "0", ",", "nn"}], "}"}]}], "]"}], ";", 
   RowBox[{"Do", "[", 
    RowBox[{
     RowBox[{"Do", "[", 
      RowBox[{
       RowBox[{"Do", "[", 
        RowBox[{
         RowBox[{"Do", "[", 
          RowBox[{
           RowBox[{"If", "[", 
            RowBox[{
             RowBox[{
              RowBox[{
               RowBox[{"(", 
                RowBox[{"i", "-", "l"}], ")"}], ">", "0"}], "&&", 
              RowBox[{
               RowBox[{"(", 
                RowBox[{"j", "-", "m"}], ")"}], ">", "0"}]}], ",", 
             RowBox[{"{", " ", 
              RowBox[{
               RowBox[{"f", "[", 
                RowBox[{"i", ",", "j", ",", "l", ",", "m"}], "]"}], "=", 
               RowBox[{
                RowBox[{"(", 
                 RowBox[{
                  RowBox[{"d", "*", 
                   RowBox[{"i", "/", 
                    RowBox[{"(", 
                    RowBox[{"i", "+", "j"}], ")"}]}], "*", 
                   RowBox[{
                    RowBox[{"(", 
                    RowBox[{"1", "-", "p"}], ")"}], "^", 
                    RowBox[{"(", 
                    RowBox[{"i", "-", "1"}], ")"}]}], "*", 
                   RowBox[{"f", "[", 
                    RowBox[{
                    RowBox[{"i", "-", "1"}], ",", "j", ",", "l", ",", "m"}], 
                    "]"}]}], "+", 
                  RowBox[{"d", "*", 
                   RowBox[{"j", "/", 
                    RowBox[{"(", 
                    RowBox[{"i", "+", "j"}], ")"}]}], "*", 
                   RowBox[{
                    RowBox[{"(", 
                    RowBox[{"1", "-", "p"}], ")"}], "^", "i"}], "*", 
                   RowBox[{"f", "[", 
                    RowBox[{"i", ",", 
                    RowBox[{"j", "-", "1"}], ",", "l", ",", "m"}], "]"}]}]}], 
                 ")"}], "/", 
                RowBox[{"(", 
                 RowBox[{"1", "-", 
                  RowBox[{
                   RowBox[{"(", 
                    RowBox[{"1", "-", "d"}], ")"}], "*", 
                   RowBox[{
                    RowBox[{"(", 
                    RowBox[{"1", "-", "p"}], ")"}], "^", "i"}]}]}], ")"}]}]}],
               "}"}]}], "]"}], ",", 
           RowBox[{"{", 
            RowBox[{"i", ",", "l", ",", "nn"}], "}"}]}], "]"}], ",", 
         RowBox[{"{", 
          RowBox[{"j", ",", "m", ",", "nn"}], "}"}]}], "]"}], ",", 
       RowBox[{"{", 
        RowBox[{"l", ",", "1", ",", "nn"}], "}"}]}], "]"}], ",", 
     RowBox[{"{", 
      RowBox[{"m", ",", "0", ",", "nn"}], "}"}]}], "]"}], ";", 
   RowBox[{
    RowBox[{"mu", "[", 
     RowBox[{"0", ",", "0"}], "]"}], "=", "1"}], ";", 
   RowBox[{"Do", "[", 
    RowBox[{
     RowBox[{"Do", "[", 
      RowBox[{
       RowBox[{"If", "[", 
        RowBox[{
         RowBox[{
          RowBox[{"i", "+", "j"}], ">", "0"}], ",", 
         RowBox[{
          RowBox[{"mu", "[", 
           RowBox[{"i", ",", "j"}], "]"}], "=", 
          RowBox[{
           RowBox[{"(", 
            RowBox[{
             RowBox[{"d", "*", 
              RowBox[{"i", "/", 
               RowBox[{"(", 
                RowBox[{"i", "+", "j"}], ")"}]}], "*", 
              RowBox[{
               RowBox[{"(", 
                RowBox[{"1", "-", "p"}], ")"}], "^", 
               RowBox[{"(", 
                RowBox[{"i", "-", "1"}], ")"}]}], "*", 
              RowBox[{"mu", "[", 
               RowBox[{
                RowBox[{"i", "-", "1"}], ",", "j"}], "]"}]}], "+", 
             RowBox[{"d", "*", 
              RowBox[{"j", "/", 
               RowBox[{"(", 
                RowBox[{"i", "+", "j"}], ")"}]}], "*", 
              RowBox[{
               RowBox[{"(", 
                RowBox[{"1", "-", "p"}], ")"}], "^", "i"}], "*", 
              RowBox[{"mu", "[", 
               RowBox[{"i", ",", 
                RowBox[{"j", "-", "1"}]}], "]"}]}]}], ")"}], "/", 
           RowBox[{"(", 
            RowBox[{"1", "-", 
             RowBox[{
              RowBox[{"(", 
               RowBox[{"1", "-", "d"}], ")"}], 
              RowBox[{
               RowBox[{"(", 
                RowBox[{"1", "-", "p"}], ")"}], "^", "i"}]}]}], ")"}]}]}]}], 
        "]"}], ",", 
       RowBox[{"{", 
        RowBox[{"i", ",", "0", ",", "nn"}], "}"}]}], "]"}], ",", 
     RowBox[{"{", 
      RowBox[{"j", ",", "0", ",", "nn"}], "}"}]}], "]"}]}]}]], "Input",
 CellChangeTimes->{{3.5671778849463387`*^9, 3.567177928096222*^9}, {
   3.567178827245281*^9, 3.567178954761036*^9}, {3.567179014714517*^9, 
   3.5671790151779137`*^9}, {3.576952250582658*^9, 3.57695229070931*^9}, 
   3.576952370658824*^9, {3.576952431255158*^9, 3.576952441982088*^9}, {
   3.576952509708315*^9, 3.576952562666218*^9}}],

Cell[BoxData[
 RowBox[{"Do", "[", 
  RowBox[{
   RowBox[{"Do", "[", 
    RowBox[{
     RowBox[{
      RowBox[{"Pro", "[", 
       RowBox[{"l", ",", "m"}], "]"}], "=", 
      RowBox[{"Sum", "[", 
       RowBox[{
        RowBox[{
         RowBox[{"UnitStep", "[", 
          RowBox[{"i", "-", "l"}], "]"}], "*", 
         RowBox[{"UnitStep", "[", 
          RowBox[{"nn", "-", "i", "-", "m"}], "]"}], "*", 
         RowBox[{
          RowBox[{
           RowBox[{"nn", "!"}], "/", 
           RowBox[{"i", "!"}]}], "/", 
          RowBox[{
           RowBox[{"(", 
            RowBox[{"nn", "-", "i"}], ")"}], "!"}]}], "*", 
         RowBox[{"g", "^", "i"}], "*", 
         RowBox[{
          RowBox[{"(", 
           RowBox[{"1", "-", "g"}], ")"}], "^", 
          RowBox[{"(", 
           RowBox[{"nn", "-", "i"}], ")"}]}], "*", 
         RowBox[{"f", "[", 
          RowBox[{"i", ",", 
           RowBox[{"nn", "-", "i"}], ",", "l", ",", "m"}], "]"}]}], ",", 
        RowBox[{"{", 
         RowBox[{"i", ",", "0", ",", "nn"}], "}"}]}], "]"}]}], ",", 
     RowBox[{"{", 
      RowBox[{"l", ",", "1", ",", "nn"}], "}"}]}], "]"}], ",", 
   RowBox[{"{", 
    RowBox[{"m", ",", "0", ",", "nn"}], "}"}]}], "]"}]], "Input",
 CellChangeTimes->{{3.567198300278509*^9, 3.567198374188736*^9}, {
  3.567198966567955*^9, 3.567198966749814*^9}, {3.567199143846137*^9, 
  3.56719918435777*^9}}],

Cell[BoxData[
 RowBox[{
  RowBox[{"Do", "[", 
   RowBox[{
    RowBox[{
     RowBox[{"Prtot", "[", "i", "]"}], "=", 
     RowBox[{"Sum", "[", 
      RowBox[{
       RowBox[{"Pro", "[", 
        RowBox[{"l", ",", 
         RowBox[{"i", "-", "l"}]}], "]"}], ",", 
       RowBox[{"{", 
        RowBox[{"l", ",", "1", ",", "i"}], "}"}]}], "]"}]}], ",", 
    RowBox[{"{", 
     RowBox[{"i", ",", "1", ",", "nn"}], "}"}]}], "]"}], ";", 
  RowBox[{
   RowBox[{"Prtot", "[", "0", "]"}], "=", 
   RowBox[{"1", "-", 
    RowBox[{"Sum", "[", 
     RowBox[{
      RowBox[{"Prtot", "[", "i", "]"}], ",", 
      RowBox[{"{", 
       RowBox[{"i", ",", "1", ",", "nn"}], "}"}]}], "]"}]}]}], ";", 
  RowBox[{"PRtot", "=", 
   RowBox[{"Table", "[", 
    RowBox[{
     RowBox[{"{", 
      RowBox[{"i", ",", 
       RowBox[{"Prtot", "[", "i", "]"}]}], "}"}], ",", 
     RowBox[{"{", 
      RowBox[{"i", ",", "0", ",", "nn"}], "}"}]}], "]"}]}], ";"}]], "Input",
 CellChangeTimes->{{3.567257552211101*^9, 3.567257563514008*^9}, {
  3.576952308971434*^9, 3.5769523186616697`*^9}}],

Cell[BoxData[
 RowBox[{
  RowBox[{"(*", " ", 
   RowBox[{
   "This", " ", "is", " ", "the", " ", "probability", " ", "distribution", 
    " ", "of", " ", "the", " ", "number", " ", "of", " ", "people", " ", 
    "who", " ", "survive", " ", "an", " ", "attack"}], " ", "*)"}], " ", 
  RowBox[{
   RowBox[{"K1", "=", 
    RowBox[{"FullSimplify", "[", 
     RowBox[{"PRtot", "/.", 
      RowBox[{"{", 
       RowBox[{
        RowBox[{"d", "\[Rule]", "0.1"}], ",", " ", 
        RowBox[{"p", "\[Rule]", "0.02"}]}], "}"}]}], "]"}]}], 
   ";"}]}]], "Input",
 CellChangeTimes->{{3.567199902200328*^9, 3.567199948317563*^9}, {
   3.567436923133711*^9, 3.567436954205271*^9}, {3.5674370353014393`*^9, 
   3.567437070373555*^9}, 3.567437390356759*^9, {3.5769525811355543`*^9, 
   3.576952620114079*^9}}],

Cell[CellGroupData[{

Cell[BoxData[
 RowBox[{"ListPlot", "[", 
  RowBox[{
   RowBox[{"{", 
    RowBox[{
     RowBox[{"K1", "/.", 
      RowBox[{"{", 
       RowBox[{"g", "\[Rule]", "0.1"}], "}"}]}], ",", 
     RowBox[{"K1", "/.", 
      RowBox[{"{", 
       RowBox[{"g", "\[Rule]", "0.5"}], "}"}]}], ",", 
     RowBox[{"K1", "/.", 
      RowBox[{"{", 
       RowBox[{"g", "\[Rule]", "1"}], "}"}]}]}], "}"}], ",", 
   RowBox[{"PlotMarkers", "\[Rule]", "Automatic"}], ",", " ", 
   RowBox[{"Joined", "\[Rule]", "True"}], ",", " ", 
   RowBox[{"PlotRange", "\[Rule]", "All"}], ",", " ", 
   RowBox[{"Frame", "\[Rule]", "True"}]}], "]"}]], "Input"],

Cell[BoxData[
 GraphicsBox[{{}, GraphicsComplexBox[CompressedData["
1:eJxTTMoPSmViYGBQBGIQDQMZk3b8Orb5oT2E98F+U2WG39TLCVA+g0PErlQ1
OZcSKJ/DQevsrpkvU5qgfAGHoLkiz4rv9UL5Ig6sb6XPFLyZBuVLOFywMCqc
J7gQypdx2GFkf8aeeyWUr+Awte4kt7HPJihfySFJqviMw+1dUL6Kw99TWxP3
+x2EuYdB4TR7Q+nSxXD3Ttjp2DMzLgzuXoGGt9l+/7Pg7i3wupnzObMS7t4f
Ko/XS/u0wd1r4STddCppMty9HQ+Zk5ZYIdw7Y/qi7Wefroe7N+eD2Rc+xf1w
9z71uSnionwB7t76+1obNR7egbuXoWGt9bTzHnD3MgS9ZPvhoAJ3L8PvV0eu
LLKAu5fBLj/5UYwX3L0NPPtFZt2MgbuX4ZH8gehjBXD3Nmh3Gvv/aoG7d8G1
GWEKPnPg7rU4usdBYcoWuHuPTGraHy6NcK/K/hunM148tgcAcwyL1w==
    "], {{{}, {}, 
      {RGBColor[0.24720000000000014`, 0.24, 0.6], 
       LineBox[{1, 2, 3, 4, 5, 6, 7, 8, 9, 10, 11}]}, 
      {RGBColor[0.6, 0.24, 0.4428931686004542], 
       LineBox[{12, 13, 14, 15, 16, 17, 18, 19, 20, 21, 22}]}, 
      {RGBColor[0.6, 0.5470136627990908, 0.24], 
       LineBox[{23, 24, 25, 26, 27, 28, 29, 30, 31, 32, 33}]}}, {
      {RGBColor[0.24720000000000014`, 0.24, 0.6], InsetBox[
        StyleBox["\<\"\[FilledCircle]\"\>",
         StripOnInput->False,
         FontSize->8.96], 1], InsetBox[
        StyleBox["\<\"\[FilledCircle]\"\>",
         StripOnInput->False,
         FontSize->8.96], 2], InsetBox[
        StyleBox["\<\"\[FilledCircle]\"\>",
         StripOnInput->False,
         FontSize->8.96], 3], InsetBox[
        StyleBox["\<\"\[FilledCircle]\"\>",
         StripOnInput->False,
         FontSize->8.96], 4], InsetBox[
        StyleBox["\<\"\[FilledCircle]\"\>",
         StripOnInput->False,
         FontSize->8.96], 5], InsetBox[
        StyleBox["\<\"\[FilledCircle]\"\>",
         StripOnInput->False,
         FontSize->8.96], 6], InsetBox[
        StyleBox["\<\"\[FilledCircle]\"\>",
         StripOnInput->False,
         FontSize->8.96], 7], InsetBox[
        StyleBox["\<\"\[FilledCircle]\"\>",
         StripOnInput->False,
         FontSize->8.96], 8], InsetBox[
        StyleBox["\<\"\[FilledCircle]\"\>",
         StripOnInput->False,
         FontSize->8.96], 9], InsetBox[
        StyleBox["\<\"\[FilledCircle]\"\>",
         StripOnInput->False,
         FontSize->8.96], 10], InsetBox[
        StyleBox["\<\"\[FilledCircle]\"\>",
         StripOnInput->False,
         FontSize->8.96], 11]}, 
      {RGBColor[0.6, 0.24, 0.4428931686004542], InsetBox[
        StyleBox["\<\"\[FilledSquare]\"\>",
         StripOnInput->False,
         FontSize->8.96], 12], InsetBox[
        StyleBox["\<\"\[FilledSquare]\"\>",
         StripOnInput->False,
         FontSize->8.96], 13], InsetBox[
        StyleBox["\<\"\[FilledSquare]\"\>",
         StripOnInput->False,
         FontSize->8.96], 14], InsetBox[
        StyleBox["\<\"\[FilledSquare]\"\>",
         StripOnInput->False,
         FontSize->8.96], 15], InsetBox[
        StyleBox["\<\"\[FilledSquare]\"\>",
         StripOnInput->False,
         FontSize->8.96], 16], InsetBox[
        StyleBox["\<\"\[FilledSquare]\"\>",
         StripOnInput->False,
         FontSize->8.96], 17], InsetBox[
        StyleBox["\<\"\[FilledSquare]\"\>",
         StripOnInput->False,
         FontSize->8.96], 18], InsetBox[
        StyleBox["\<\"\[FilledSquare]\"\>",
         StripOnInput->False,
         FontSize->8.96], 19], InsetBox[
        StyleBox["\<\"\[FilledSquare]\"\>",
         StripOnInput->False,
         FontSize->8.96], 20], InsetBox[
        StyleBox["\<\"\[FilledSquare]\"\>",
         StripOnInput->False,
         FontSize->8.96], 21], InsetBox[
        StyleBox["\<\"\[FilledSquare]\"\>",
         StripOnInput->False,
         FontSize->8.96], 22]}, 
      {RGBColor[0.6, 0.5470136627990908, 0.24], InsetBox[
        StyleBox["\<\"\[FilledDiamond]\"\>",
         StripOnInput->False,
         FontSize->10.88], 23], InsetBox[
        StyleBox["\<\"\[FilledDiamond]\"\>",
         StripOnInput->False,
         FontSize->10.88], 24], InsetBox[
        StyleBox["\<\"\[FilledDiamond]\"\>",
         StripOnInput->False,
         FontSize->10.88], 25], InsetBox[
        StyleBox["\<\"\[FilledDiamond]\"\>",
         StripOnInput->False,
         FontSize->10.88], 26], InsetBox[
        StyleBox["\<\"\[FilledDiamond]\"\>",
         StripOnInput->False,
         FontSize->10.88], 27], InsetBox[
        StyleBox["\<\"\[FilledDiamond]\"\>",
         StripOnInput->False,
         FontSize->10.88], 28], InsetBox[
        StyleBox["\<\"\[FilledDiamond]\"\>",
         StripOnInput->False,
         FontSize->10.88], 29], InsetBox[
        StyleBox["\<\"\[FilledDiamond]\"\>",
         StripOnInput->False,
         FontSize->10.88], 30], InsetBox[
        StyleBox["\<\"\[FilledDiamond]\"\>",
         StripOnInput->False,
         FontSize->10.88], 31], InsetBox[
        StyleBox["\<\"\[FilledDiamond]\"\>",
         StripOnInput->False,
         FontSize->10.88], 32], InsetBox[
        StyleBox["\<\"\[FilledDiamond]\"\>",
         StripOnInput->False,
         FontSize->10.88], 33]}, {}}}], {}},
  AspectRatio->NCache[GoldenRatio^(-1), 0.6180339887498948],
  Axes->True,
  AxesOrigin->{0., 0.00015452411340056982`},
  Frame->True,
  FrameLabel->{None, None},
  Method->{},
  PlotRange->{All, All},
  PlotRangeClipping->True,
  PlotRangePadding->{Automatic, Automatic}]], "Output",
 CellChangeTimes->{3.576951699001011*^9, 3.576952187594593*^9, 
  3.576952395481205*^9}]
}, Open  ]],

Cell[BoxData[
 RowBox[{
  RowBox[{"Ave", "=", 
   RowBox[{"Sum", "[", 
    RowBox[{
     RowBox[{
      RowBox[{"Prtot", "[", "i", "]"}], "*", "i"}], ",", 
     RowBox[{"{", 
      RowBox[{"i", ",", "1", ",", "nn"}], "}"}]}], "]"}]}], ";", 
  RowBox[{"(*", " ", 
   RowBox[{
    RowBox[{"This", " ", "is", " ", "the", " ", "function", " ", "F", 
     RowBox[{"(", "g", ")"}]}], ",", " ", 
    RowBox[{
    "the", " ", "probability", " ", "to", " ", "dies", " ", "in", " ", "an", 
     " ", "attack"}]}], " ", "*)"}], " ", 
  RowBox[{"FF", "=", 
   RowBox[{"1", "-", 
    RowBox[{"Ave", "/", "nn"}]}]}], ";"}]], "Input",
 CellChangeTimes->{{3.567257630765479*^9, 3.567257660658313*^9}, {
   3.567257699055421*^9, 3.5672576994346*^9}, {3.5672585210700607`*^9, 
   3.567258523411887*^9}, 3.576952334537818*^9, {3.576952636033146*^9, 
   3.576952652005479*^9}}],

Cell[CellGroupData[{

Cell[BoxData[
 RowBox[{
  RowBox[{"(*", " ", 
   RowBox[{"Calculate", " ", "the", " ", "parameter", " ", "beta"}], " ", 
   "*)"}], " ", 
  RowBox[{
   RowBox[{"d", "=."}], ";", " ", 
   RowBox[{"p", "=."}], ";", " ", 
   RowBox[{"beta", "=", 
    RowBox[{"FullSimplify", "[", 
     RowBox[{
      RowBox[{"1", "/", "n"}], "*", 
      RowBox[{"(", 
       RowBox[{
        RowBox[{"Sum", "[", 
         RowBox[{
          RowBox[{
           RowBox[{"j", "^", "2"}], "*", 
           RowBox[{"d", "^", 
            RowBox[{"(", 
             RowBox[{"n", "-", "j"}], ")"}]}], "*", 
           RowBox[{
            RowBox[{"(", 
             RowBox[{"1", "-", "p"}], ")"}], "^", 
            RowBox[{"(", 
             RowBox[{"n", "-", "j", "-", "1"}], ")"}]}], "*", 
           RowBox[{
            RowBox[{"(", 
             RowBox[{
              RowBox[{"d", "*", 
               RowBox[{"(", 
                RowBox[{"1", "-", "p"}], ")"}]}], "+", "p"}], ")"}], "^", 
            RowBox[{"(", 
             RowBox[{"j", "-", "1"}], ")"}]}]}], ",", 
          RowBox[{"{", 
           RowBox[{"j", ",", "1", ",", 
            RowBox[{"n", "-", "1"}]}], "}"}]}], "]"}], "+", 
        RowBox[{
         RowBox[{"n", "^", "2"}], "*", 
         RowBox[{"(", 
          RowBox[{"1", "-", "d"}], ")"}], "*", 
         RowBox[{
          RowBox[{"(", 
           RowBox[{
            RowBox[{"d", "*", 
             RowBox[{"(", 
              RowBox[{"1", "-", "p"}], ")"}]}], "+", "p"}], ")"}], "^", 
          RowBox[{"(", 
           RowBox[{"n", "-", "1"}], ")"}]}]}]}], ")"}], "*", "p", "*", 
      RowBox[{"g", "/", 
       RowBox[{
        RowBox[{"(", 
         RowBox[{
          RowBox[{"d", "*", 
           RowBox[{"(", 
            RowBox[{"1", "-", "p"}], ")"}]}], "+", "p"}], ")"}], "^", 
        "n"}]}]}], "]"}]}]}]}]], "Input",
 CellChangeTimes->{{3.567259427304904*^9, 3.56725943453622*^9}, {
  3.567259489566958*^9, 3.567259610046957*^9}, {3.567261304437764*^9, 
  3.5672613060377913`*^9}, {3.576947749696702*^9, 3.57694775262958*^9}, {
  3.576951534460787*^9, 3.5769515614447327`*^9}, {3.5769522029006*^9, 
  3.576952216125105*^9}, {3.576952339891882*^9, 3.576952347361106*^9}}],

Cell[BoxData[
 RowBox[{
  FractionBox["1", 
   RowBox[{"n", " ", 
    SuperscriptBox["p", "2"]}]], 
  RowBox[{"g", " ", 
   RowBox[{"(", 
    RowBox[{
     RowBox[{"2", " ", 
      SuperscriptBox["d", "2"]}], "+", 
     RowBox[{"d", " ", "p"}], "-", 
     RowBox[{"2", " ", 
      SuperscriptBox["d", "2"], " ", "p"}], "-", 
     RowBox[{"2", " ", "d", " ", "n", " ", "p"}], "+", 
     RowBox[{
      SuperscriptBox["n", "2"], " ", 
      SuperscriptBox["p", "2"]}], "+", 
     RowBox[{
      SuperscriptBox["d", 
       RowBox[{"1", "+", "n"}]], " ", 
      SuperscriptBox[
       RowBox[{"(", 
        RowBox[{"1", "-", "p"}], ")"}], "n"], " ", 
      RowBox[{"(", 
       RowBox[{
        RowBox[{"2", " ", "d", " ", 
         RowBox[{"(", 
          RowBox[{
           RowBox[{"-", "1"}], "+", "p"}], ")"}]}], "-", "p"}], ")"}], " ", 
      SuperscriptBox[
       RowBox[{"(", 
        RowBox[{"d", "+", "p", "-", 
         RowBox[{"d", " ", "p"}]}], ")"}], 
       RowBox[{"-", "n"}]]}]}], ")"}]}]}]], "Output",
 CellChangeTimes->{{3.567259518640719*^9, 3.567259532842092*^9}, {
   3.567259571737492*^9, 3.567259610528442*^9}, 3.5672600048216867`*^9, 
   3.567260794783184*^9, 3.567261307126878*^9, 3.5672622050296507`*^9, 
   3.567284314932377*^9, {3.56743592854185*^9, 3.567435939630929*^9}, 
   3.5679528023273706`*^9, 3.576947755291543*^9, 3.576951704413172*^9, 
   3.5769522183141727`*^9, 3.5769524050116043`*^9}]
}, Open  ]],

Cell[BoxData[
 RowBox[{
  RowBox[{"pp", "=", "0.02"}], ";", " ", 
  RowBox[{"dd", "=", "0.1"}], ";"}]], "Input",
 CellChangeTimes->{
  3.576951756038292*^9, {3.5769517992384653`*^9, 3.576951835986474*^9}, 
   3.576952354197929*^9}],

Cell[CellGroupData[{

Cell[BoxData[
 RowBox[{"LogPlot", "[", 
  RowBox[{
   RowBox[{"{", 
    RowBox[{
     RowBox[{"FF", "/.", 
      RowBox[{"{", 
       RowBox[{
        RowBox[{"n", "\[Rule]", "nn"}], ",", 
        RowBox[{"p", "\[Rule]", "pp"}], ",", 
        RowBox[{"d", "\[Rule]", "dd"}]}], "}"}]}], ",", 
     RowBox[{"E", "^", 
      RowBox[{"(", 
       RowBox[{
        RowBox[{"-", "beta"}], "/.", 
        RowBox[{"{", 
         RowBox[{
          RowBox[{"n", "\[Rule]", "nn"}], ",", 
          RowBox[{"p", "\[Rule]", "pp"}], ",", 
          RowBox[{"d", "\[Rule]", "dd"}]}], "}"}]}], ")"}]}]}], "}"}], ",", 
   RowBox[{"{", 
    RowBox[{"g", ",", "0", ",", "1"}], "}"}], ",", " ", 
   RowBox[{"PlotRange", "\[Rule]", 
    RowBox[{"{", 
     RowBox[{"0", ",", "1"}], "}"}]}], ",", " ", 
   RowBox[{"Frame", "\[Rule]", "True"}], ",", " ", 
   RowBox[{"PlotStyle", "\[Rule]", 
    RowBox[{"{", 
     RowBox[{
      RowBox[{"{", 
       RowBox[{
        RowBox[{"Thickness", "[", "0.01", "]"}], ",", "Gray"}], "}"}], ",", 
      RowBox[{"{", 
       RowBox[{"Thick", ",", "Black"}], "}"}]}], "}"}]}]}], "]"}]], "Input",
 CellChangeTimes->{{3.576951616748423*^9, 3.5769516221425257`*^9}, {
  3.576952420930428*^9, 3.57695242416053*^9}}],

Cell[BoxData[
 GraphicsBox[{{}, {}, 
   {GrayLevel[0.5], Thickness[0.01], LineBox[CompressedData["
1:eJwVx3881HccwPH7+WWzXaHlcRUiIhUeIkvqXdMP+bFyUXqkNCG7rVWyYo+Z
nR2ijLUr5XeSVeRHjqvI57PcUT3Or6jr8uM4h8PxlZ9R3OyP1+P1eJoFneGE
0CgUivdi/98jRN2CB/22p9fPxqqmI2sYbivOKtiOMNvLcnDtP4Q25dzILGfv
ApnfOLT3hSLPBtnDLLYvnHyinDzZdwEdDp55epUdDEm2mXk3VfGo0y7BLZkd
AXxZ66xB73WU+9X++CQ2HwSXeiY+KgoQT7fcKpEtAOfV45Fx8krkf+RWydj7
fIg8tC0yCtUjPS0vYK9JCYike1blpbUgS59Rde1lIYxfa3u6bJ0MXWzcAjcm
H8Nf+kXJirWdyEio30WlIuC2m3ES/XtQpdJN2uT6DJpzo1XqAyr0jJu18ohG
DOJXigkfhwE0tXbbkgen62Gs8vSMi3wQ0WYLl660fAlaQ+sYSbEGbdaeqDxY
LAVxnVrHax+JpHzHxjqbJpigu6ChvjFkmjo8e2+0GRIb28a0W8fR8Iyi67X9
K+DVsA5URUyg/KGql6w/W8FJx7bOA08ilvE/pErVBukuk5sG56fQle8rQnMt
3kCipahYajKDpncUqsJiZLCm2z+3ff8HFOEgFi6vfQt7nA23ZwTPIkWx+HKL
2TvQ7YzeKUiYQx+5bRnrfmmHozlDYJT5Ea3fqbMQWtUBy0tVEsm1T2hvntmp
MqMu8E5abXcqYx5dNA407wlQwM+BHn5WCQtog8ZPT+bdDdO1Q3JOqBYZLhnT
Fc91g/H7sbZGKwpmoIySNZk98LCpoOBaKgX/4Fgl/8xTCfbHKmgv5im4cF9Q
bs20Es7Xi5xLg6l4anjF0v7rvSDZ6Fc9iqm44uBeumCXCrQtWfFMMxqOcY/L
Efar4FP/tNDiIg2bdXq8vR3XB4dEFBv/5zTs4swXsB36gRrmend+FR0HmDTN
Ulv7Idvh3+XtYXQ89TJZeZY3AFbR75w7RXR8g3E8gmOhht399Ba0QMeGXRV5
NLEa8s+4pxTuZGBmNM93y7lBEGkOcOMTGJhy73iJ0mAIdged0vOoY+Dw9JJk
g2dDUNSX0y7VYeKn6y/p6v80DLF2tWmPdzOxvkf4hliWBqKc5sKjopm4Y2Nz
a1S1BpRpX3DlIiYuzQYL1fERiNW5Yx+rYeJjJZv1jRdGYCCoxppnQuDf427x
Ou6Pglov+zxxkMAP1MYZLC8SvmPdOceLJfClrLgTXd+SwF2Z58L5g8DBnBHL
Yh8SPsTIB8z5BF5VXV3qfZgEno8BWRtH4KSUo3VXgkgQlYeVMRIJHLb55vvP
o0gIVMbr8VIIbM5f5q5TQIJketmukEwCL3z965eyuySYXva65ZBFYPlI76uC
QhI8xVd7tYtOPVx+bE8ZCZPrQ4zScwisteGcj6smYYVA5tqQR+COlpRseisJ
R1LT+bb3CPwofuZk62sSPHZInOYWLdgauO72WxLqm0OkkvsE9rxjK/ymiwQ3
U/P7AUUEfhLZ8II3SAL93RbrxBICX9/olOKjIeFveh3Tt5TA55SZvmYkCY8m
5p6blBHY2utHBZ4koehCJEX4kMAMalt+6gwJNkUNEb+VE7i7Yiv3xBwJT0ZU
je5CAldzb9vZz5PwJkHMMqwgcJqp3pRWS4KvJNyxc9H/ASuXi6o=
     "]]}, 
   {GrayLevel[0], Thickness[Large], LineBox[CompressedData["
1:eJwVxXk41GkcAPDBtDNGjvmp7BBlHB2Sttxqv23aiLSRHC2Tx5bNkUx5Urae
kGsrUevppISU5nFlZp4dhvddJpankoZGrXNM45rxy8ZYErv7x+f5WEaeDDim
TaFQ/P7z/z7HRjvx2KFvC1rnLik0ZxupnqYJAyxHSOF2WcQqg9C2B7cLalm7
ISla7xs3ZRTyfSl7VsgKBJ0Ptu5rlWdQ8NHZhhuso+BZwm80VmaiPocszxxW
ImxP+5yir7yJilb+kHmZlQ4NUxaRDGUZSqXXrvuVlQ+p5dVv6EohCgl9WPVx
qhRabklzbvS2Ir2l1DAviyq4uEPj0SrqRDb+k6PNV/iQO1KdbXdchpJeucHt
aRFI7/as6r7eh0z4zH4tLQSs3JFm0/IhJJR7vujY3gRHDrEK1S0K1BRTaBaq
ksCQC7t429sRNGO7w7DiRCucTLvxdXf1ONKe4xmZ2bTDHX+RA6tNjZyXIoQH
K19AlMQqLCzoI3qR7viqZWMHrI4PEn7AU2hN3sRc+eRrYB9WROz0+YQmZgf6
u7e8gU3zNhJv0TQqHa9vN7gmhUu9TUlsLw0yMH9MKhRdMLvP9w/By1l0NVoQ
VWT9Fk5xs5o1bnNIs5OnOH5RBm49Fqt0n8+jxK0S/qrmHqB9irZsc1pAA5WS
K52W72HtAaMLh59/QZ9juu5tSP4LQjyK4x/5LSG772iLUfW94Ks+vbwjnIK9
ii1/rjHpByOORNfRWgsnmR9hD4UNgOxJ/PDJPi28SXVIT+Y3CJV1Btn037Sx
seFHumR+EHgnert0Q3QwFd2rsioYAt68zuKQIRXHOta/0/WVQ+f60A62jIp5
eyOLGjVyoFmUxuK7y/DMhKmR8uYw7FR7Kxz9v8KCg146+bsVcD/cbBlhQsMX
vTMe8JUKoDzx0m7poGHLPp+ekowPkCCKbn+bTsfuLun5rK1K+CpO5H5gry4O
s+iY05Iq4cE/kVlFFAaeac+RJ6SOQISt+/nQVga+TeUkBliPgtXmWL+xFD1s
3C8o1paMwqeF62PdzsvxsgupgW7cMVDFKe3tFpZjSjmnSk6Mw4gwf38wXx+f
uluVQzSNA704wUT1iwFusMumM+MnwDVwF68PDDHT59SmNAMVxAyeMCvTGOJe
+9fSc2IVyDOH78RyjHD1fbBWcNSQx9iRT9YZ4fAqZ6b5ohqec5nTD1cycUrG
w9Tep5NwrXzhMf0sE1eMmt8z2EdCyKsV7e+lTJxdmBHRv5+E1Qcr2hK7mfho
gNqm0p+EIdn3bQYyJl4tFlf7BZMQO3Tmz13vmfhy7o8tVyNJuDDd0/J0kImP
O9+ZYpwjocS0sDlZzcTs9BXetDISJqNsGkxpBF50Pa8ve0LCs4kGMZ9O4Hfq
4TdlPBKSEoLE+xkEzguuDd9TQwIlOas+TZ/ASxsDTmeISTDOGRONGxO4tzP3
vo6UBNfaCmHdWgL/njn7k7SbhC8ue4SBbALnexzZUNJDQpO4XzBpRWDfR5v5
u/pJ8G0xFLDXEbju7Mu21DESOO+4tZftCXzT3inXX0WCFYdRa+1AYK68INCS
JGFEXvyscQuB1++LG8DTJHBV0pq/txGYqtVVmjdLghM3ruaqE4EHBR4xEfMk
zM9Qa2xdCCyOKXHY8oUElFxYjV0JfGuN3szSEgnpS07Vh90J/C+y+3ye
     "]]}},
  AspectRatio->NCache[GoldenRatio^(-1), 0.6180339887498948],
  Axes->True,
  AxesOrigin->{0, -4.55698657350138},
  CoordinatesToolOptions:>{"DisplayFunction" -> ({
      Part[#, 1], 
      Exp[
       Part[#, 2]]}& ), "CopiedValueFunction" -> ({
      Part[#, 1], 
      Exp[
       Part[#, 2]]}& )},
  Frame->True,
  FrameLabel->{None, None},
  FrameTicks->{{{{-4.605170185988092, 
       FormBox[
        TagBox[
         InterpretationBox["\"0.01\"", 0.01, AutoDelete -> True], 
         NumberForm[#, {
           DirectedInfinity[1], 2}, NumberPadding -> {"", "0"}]& ], 
        TraditionalForm]}, {-3.912023005428146, 
       FormBox[
        TagBox[
         InterpretationBox["\"0.02\"", 0.02, AutoDelete -> True], 
         NumberForm[#, {
           DirectedInfinity[1], 2}, NumberPadding -> {"", "0"}]& ], 
        TraditionalForm]}, {-2.995732273553991, 
       FormBox[
        TagBox[
         InterpretationBox["\"0.05\"", 0.05, AutoDelete -> True], 
         NumberForm[#, {
           DirectedInfinity[1], 2}, NumberPadding -> {"", "0"}]& ], 
        TraditionalForm]}, {-2.302585092994046, 
       FormBox[
        TagBox[
         InterpretationBox["\"0.10\"", 0.1, AutoDelete -> True], 
         NumberForm[#, {
           DirectedInfinity[1], 2}, NumberPadding -> {"", "0"}]& ], 
        TraditionalForm]}, {-1.6094379124341003`, 
       FormBox[
        TagBox[
         InterpretationBox["\"0.20\"", 0.2, AutoDelete -> True], 
         NumberForm[#, {
           DirectedInfinity[1], 2}, NumberPadding -> {"", "0"}]& ], 
        TraditionalForm]}, {-0.6931471805599453, 
       FormBox[
        TagBox[
         InterpretationBox["\"0.50\"", 0.5, AutoDelete -> True], 
         NumberForm[#, {
           DirectedInfinity[1], 2}, NumberPadding -> {"", "0"}]& ], 
        TraditionalForm]}, {0., 
       FormBox[
        TagBox[
         InterpretationBox["\"1.00\"", 1., AutoDelete -> True], NumberForm[#, {
           DirectedInfinity[1], 2}, NumberPadding -> {"", "0"}]& ], 
        TraditionalForm]}, {0.6931471805599453, 
       FormBox[
        TagBox[
         InterpretationBox["\"2.00\"", 2., AutoDelete -> True], NumberForm[#, {
           DirectedInfinity[1], 2}, NumberPadding -> {"", "0"}]& ], 
        TraditionalForm]}, {1.6094379124341003`, 
       FormBox[
        TagBox[
         InterpretationBox["\"5.00\"", 5., AutoDelete -> True], NumberForm[#, {
           DirectedInfinity[1], 2}, NumberPadding -> {"", "0"}]& ], 
        TraditionalForm]}, {-3.506557897319982, 
       FormBox["\"\"", TraditionalForm], {0.00375, 0.}, {
        Thickness[0.001]}}, {-3.2188758248682006`, 
       FormBox["\"\"", TraditionalForm], {0.00375, 0.}, {
        Thickness[0.001]}}, {-2.8134107167600364`, 
       FormBox["\"\"", TraditionalForm], {0.00375, 0.}, {
        Thickness[0.001]}}, {-2.6592600369327783`, 
       FormBox["\"\"", TraditionalForm], {0.00375, 0.}, {
        Thickness[0.001]}}, {-2.5257286443082556`, 
       FormBox["\"\"", TraditionalForm], {0.00375, 0.}, {
        Thickness[0.001]}}, {-2.4079456086518722`, 
       FormBox["\"\"", TraditionalForm], {0.00375, 0.}, {
        Thickness[0.001]}}, {-1.2039728043259361`, 
       FormBox["\"\"", TraditionalForm], {0.00375, 0.}, {
        Thickness[0.001]}}, {-0.916290731874155, 
       FormBox["\"\"", TraditionalForm], {0.00375, 0.}, {
        Thickness[0.001]}}, {-0.5108256237659907, 
       FormBox["\"\"", TraditionalForm], {0.00375, 0.}, {
        Thickness[0.001]}}, {-0.35667494393873245`, 
       FormBox["\"\"", TraditionalForm], {0.00375, 0.}, {
        Thickness[0.001]}}, {-0.2231435513142097, 
       FormBox["\"\"", TraditionalForm], {0.00375, 0.}, {
        Thickness[0.001]}}, {-0.10536051565782628`, 
       FormBox["\"\"", TraditionalForm], {0.00375, 0.}, {
        Thickness[0.001]}}, {1.0986122886681098`, 
       FormBox["\"\"", TraditionalForm], {0.00375, 0.}, {
        Thickness[0.001]}}, {1.3862943611198906`, 
       FormBox["\"\"", TraditionalForm], {0.00375, 0.}, {
        Thickness[0.001]}}}, {{-4.605170185988092, 
       FormBox["\"\"", TraditionalForm]}, {-3.912023005428146, 
       FormBox["\"\"", TraditionalForm]}, {-2.995732273553991, 
       FormBox["\"\"", TraditionalForm]}, {-2.302585092994046, 
       FormBox["\"\"", TraditionalForm]}, {-1.6094379124341003`, 
       FormBox["\"\"", TraditionalForm]}, {-0.6931471805599453, 
       FormBox["\"\"", TraditionalForm]}, {0., 
       FormBox["\"\"", TraditionalForm]}, {0.6931471805599453, 
       FormBox["\"\"", TraditionalForm]}, {1.6094379124341003`, 
       FormBox["\"\"", TraditionalForm]}, {-3.506557897319982, 
       FormBox["\"\"", TraditionalForm], {0.00375, 0.}, {
        Thickness[0.001]}}, {-3.2188758248682006`, 
       FormBox["\"\"", TraditionalForm], {0.00375, 0.}, {
        Thickness[0.001]}}, {-2.8134107167600364`, 
       FormBox["\"\"", TraditionalForm], {0.00375, 0.}, {
        Thickness[0.001]}}, {-2.6592600369327783`, 
       FormBox["\"\"", TraditionalForm], {0.00375, 0.}, {
        Thickness[0.001]}}, {-2.5257286443082556`, 
       FormBox["\"\"", TraditionalForm], {0.00375, 0.}, {
        Thickness[0.001]}}, {-2.4079456086518722`, 
       FormBox["\"\"", TraditionalForm], {0.00375, 0.}, {
        Thickness[0.001]}}, {-1.2039728043259361`, 
       FormBox["\"\"", TraditionalForm], {0.00375, 0.}, {
        Thickness[0.001]}}, {-0.916290731874155, 
       FormBox["\"\"", TraditionalForm], {0.00375, 0.}, {
        Thickness[0.001]}}, {-0.5108256237659907, 
       FormBox["\"\"", TraditionalForm], {0.00375, 0.}, {
        Thickness[0.001]}}, {-0.35667494393873245`, 
       FormBox["\"\"", TraditionalForm], {0.00375, 0.}, {
        Thickness[0.001]}}, {-0.2231435513142097, 
       FormBox["\"\"", TraditionalForm], {0.00375, 0.}, {
        Thickness[0.001]}}, {-0.10536051565782628`, 
       FormBox["\"\"", TraditionalForm], {0.00375, 0.}, {
        Thickness[0.001]}}, {1.0986122886681098`, 
       FormBox["\"\"", TraditionalForm], {0.00375, 0.}, {
        Thickness[0.001]}}, {1.3862943611198906`, 
       FormBox["\"\"", TraditionalForm], {0.00375, 0.}, {
        Thickness[0.001]}}}}, {Automatic, Automatic}},
  GridLines->{None, None},
  Method->{},
  PlotRange->{{0, 1}, {-4.55698657350138, 0.}},
  PlotRangeClipping->True,
  PlotRangePadding->{
    Scaled[0.02], {None, None}},
  Ticks->{Automatic, {{-4.605170185988092, 
      FormBox[
       TagBox[
        InterpretationBox["\"0.01\"", 0.01, AutoDelete -> True], 
        NumberForm[#, {
          DirectedInfinity[1], 2}, NumberPadding -> {"", "0"}]& ], 
       TraditionalForm]}, {-3.912023005428146, 
      FormBox[
       TagBox[
        InterpretationBox["\"0.02\"", 0.02, AutoDelete -> True], 
        NumberForm[#, {
          DirectedInfinity[1], 2}, NumberPadding -> {"", "0"}]& ], 
       TraditionalForm]}, {-2.995732273553991, 
      FormBox[
       TagBox[
        InterpretationBox["\"0.05\"", 0.05, AutoDelete -> True], 
        NumberForm[#, {
          DirectedInfinity[1], 2}, NumberPadding -> {"", "0"}]& ], 
       TraditionalForm]}, {-2.302585092994046, 
      FormBox[
       TagBox[
        InterpretationBox["\"0.10\"", 0.1, AutoDelete -> True], NumberForm[#, {
          DirectedInfinity[1], 2}, NumberPadding -> {"", "0"}]& ], 
       TraditionalForm]}, {-1.6094379124341003`, 
      FormBox[
       TagBox[
        InterpretationBox["\"0.20\"", 0.2, AutoDelete -> True], NumberForm[#, {
          DirectedInfinity[1], 2}, NumberPadding -> {"", "0"}]& ], 
       TraditionalForm]}, {-0.6931471805599453, 
      FormBox[
       TagBox[
        InterpretationBox["\"0.50\"", 0.5, AutoDelete -> True], NumberForm[#, {
          DirectedInfinity[1], 2}, NumberPadding -> {"", "0"}]& ], 
       TraditionalForm]}, {0., 
      FormBox[
       TagBox[
        InterpretationBox["\"1.00\"", 1., AutoDelete -> True], 
        NumberForm[#, {
          DirectedInfinity[1], 2}, NumberPadding -> {"", "0"}]& ], 
       TraditionalForm]}, {0.6931471805599453, 
      FormBox[
       TagBox[
        InterpretationBox["\"2.00\"", 2., AutoDelete -> True], 
        NumberForm[#, {
          DirectedInfinity[1], 2}, NumberPadding -> {"", "0"}]& ], 
       TraditionalForm]}, {1.6094379124341003`, 
      FormBox[
       TagBox[
        InterpretationBox["\"5.00\"", 5., AutoDelete -> True], 
        NumberForm[#, {
          DirectedInfinity[1], 2}, NumberPadding -> {"", "0"}]& ], 
       TraditionalForm]}, {-3.506557897319982, 
      FormBox["\"\"", TraditionalForm], {0.00375, 0.}, {
       Thickness[0.001]}}, {-3.2188758248682006`, 
      FormBox["\"\"", TraditionalForm], {0.00375, 0.}, {
       Thickness[0.001]}}, {-2.8134107167600364`, 
      FormBox["\"\"", TraditionalForm], {0.00375, 0.}, {
       Thickness[0.001]}}, {-2.6592600369327783`, 
      FormBox["\"\"", TraditionalForm], {0.00375, 0.}, {
       Thickness[0.001]}}, {-2.5257286443082556`, 
      FormBox["\"\"", TraditionalForm], {0.00375, 0.}, {
       Thickness[0.001]}}, {-2.4079456086518722`, 
      FormBox["\"\"", TraditionalForm], {0.00375, 0.}, {
       Thickness[0.001]}}, {-1.2039728043259361`, 
      FormBox["\"\"", TraditionalForm], {0.00375, 0.}, {
       Thickness[0.001]}}, {-0.916290731874155, 
      FormBox["\"\"", TraditionalForm], {0.00375, 0.}, {
       Thickness[0.001]}}, {-0.5108256237659907, 
      FormBox["\"\"", TraditionalForm], {0.00375, 0.}, {
       Thickness[0.001]}}, {-0.35667494393873245`, 
      FormBox["\"\"", TraditionalForm], {0.00375, 0.}, {
       Thickness[0.001]}}, {-0.2231435513142097, 
      FormBox["\"\"", TraditionalForm], {0.00375, 0.}, {
       Thickness[0.001]}}, {-0.10536051565782628`, 
      FormBox["\"\"", TraditionalForm], {0.00375, 0.}, {
       Thickness[0.001]}}, {1.0986122886681098`, 
      FormBox["\"\"", TraditionalForm], {0.00375, 0.}, {
       Thickness[0.001]}}, {1.3862943611198906`, 
      FormBox["\"\"", TraditionalForm], {0.00375, 0.}, {
       Thickness[0.001]}}}}]], "Output",
 CellChangeTimes->{3.576951725471712*^9, 3.5769517653569727`*^9, 
  3.576951808231679*^9, 3.5769522353553762`*^9, 3.576952420290472*^9}]
}, Open  ]]
},
WindowSize->{740, 867},
WindowMargins->{{Automatic, 291}, {Automatic, 50}},
FrontEndVersion->"9.0 for Linux x86 (64-bit) (November 20, 2012)",
StyleDefinitions->"Default.nb"
]
(* End of Notebook Content *)

(* Internal cache information *)
(*CellTagsOutline
CellTagsIndex->{}
*)
(*CellTagsIndex
CellTagsIndex->{}
*)
(*NotebookFileOutline
Notebook[{
Cell[CellGroupData[{
Cell[579, 22, 1956, 59, 143, "Input"],
Cell[2538, 83, 592, 12, 24, "Message"],
Cell[3133, 97, 590, 12, 24, "Message"],
Cell[3726, 111, 590, 12, 24, "Message"],
Cell[4319, 125, 626, 13, 24, "Message"]
}, Open  ]],
Cell[4960, 141, 11281, 319, 803, "Input"],
Cell[16244, 462, 1380, 39, 143, "Input"],
Cell[17627, 503, 1056, 32, 77, "Input"],
Cell[18686, 537, 793, 19, 77, "Input"],
Cell[CellGroupData[{
Cell[19504, 560, 622, 17, 77, "Input"],
Cell[20129, 579, 5251, 129, 243, "Output"]
}, Open  ]],
Cell[25395, 711, 857, 22, 77, "Input"],
Cell[CellGroupData[{
Cell[26277, 737, 2197, 61, 165, "Input"],
Cell[28477, 800, 1424, 39, 80, "Output"]
}, Open  ]],
Cell[29916, 842, 231, 6, 32, "Input"],
Cell[CellGroupData[{
Cell[30172, 852, 1226, 35, 99, "Input"],
Cell[31401, 889, 13666, 278, 244, "Output"]
}, Open  ]]
}
]
*)

(* End of internal cache information *)
